# Supplementary material for: Intracellular metabolic changes in Saccharomyces cerevisiae and promotion of ethanol tolerance during the bioethanol fermentation process
Source: Royal Society of Chemistry journal article supplement (doi:10.1039/c6ra19254h), 2016-01-01
Supplement: c6ra19254h1.pdf [file c6ra19254h1.pdf]

## Electronic supplementary figure captions

**ESI Fig. S-1** Variable importance of projection plots for the intracellular metabolites along component 1. (a) 2 h versus 8 h groups using PLS-DA model, (b) 2 h versus 16 h groups using PLS-DA model, and (c) 8 h versus 16 h groups using PLS-DA model.

**ESI Fig. S-2** The intracellular metabolites of *Sacharomyces cerevisiae* identified by GC-MS that differ among the lag phase (i.e., 2 h), the exponential phase (i.e., 8 h) and the stationary phase (i.e., 16 h) of the batch bioethanol fermentation process. \* $P < 0.05$ , \*\* $P < 0.01$ , \*\*\* $P < 0.001$ .

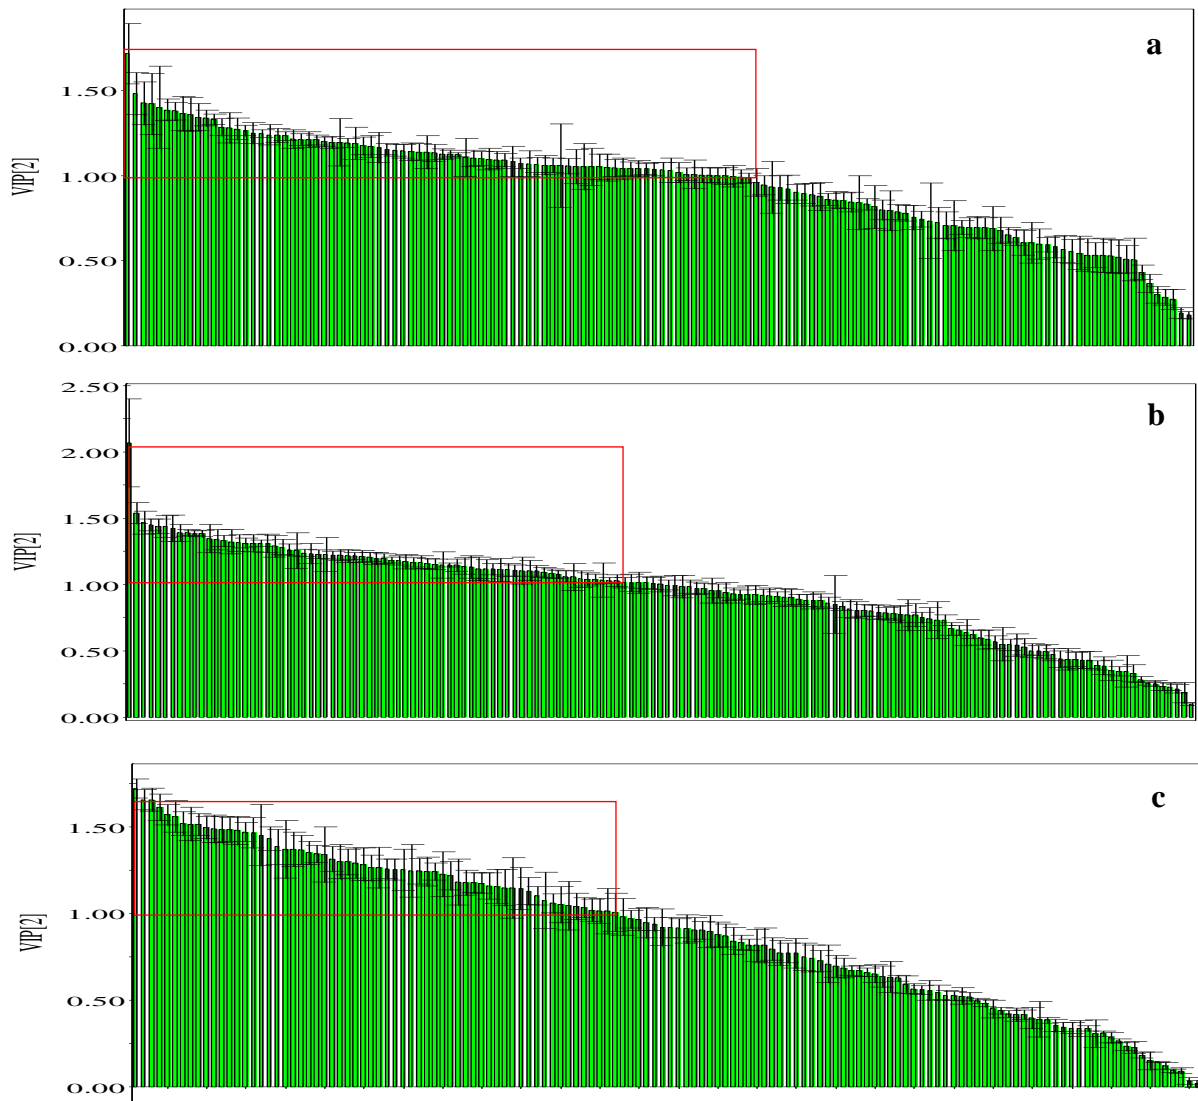

ESI Fig. S-1

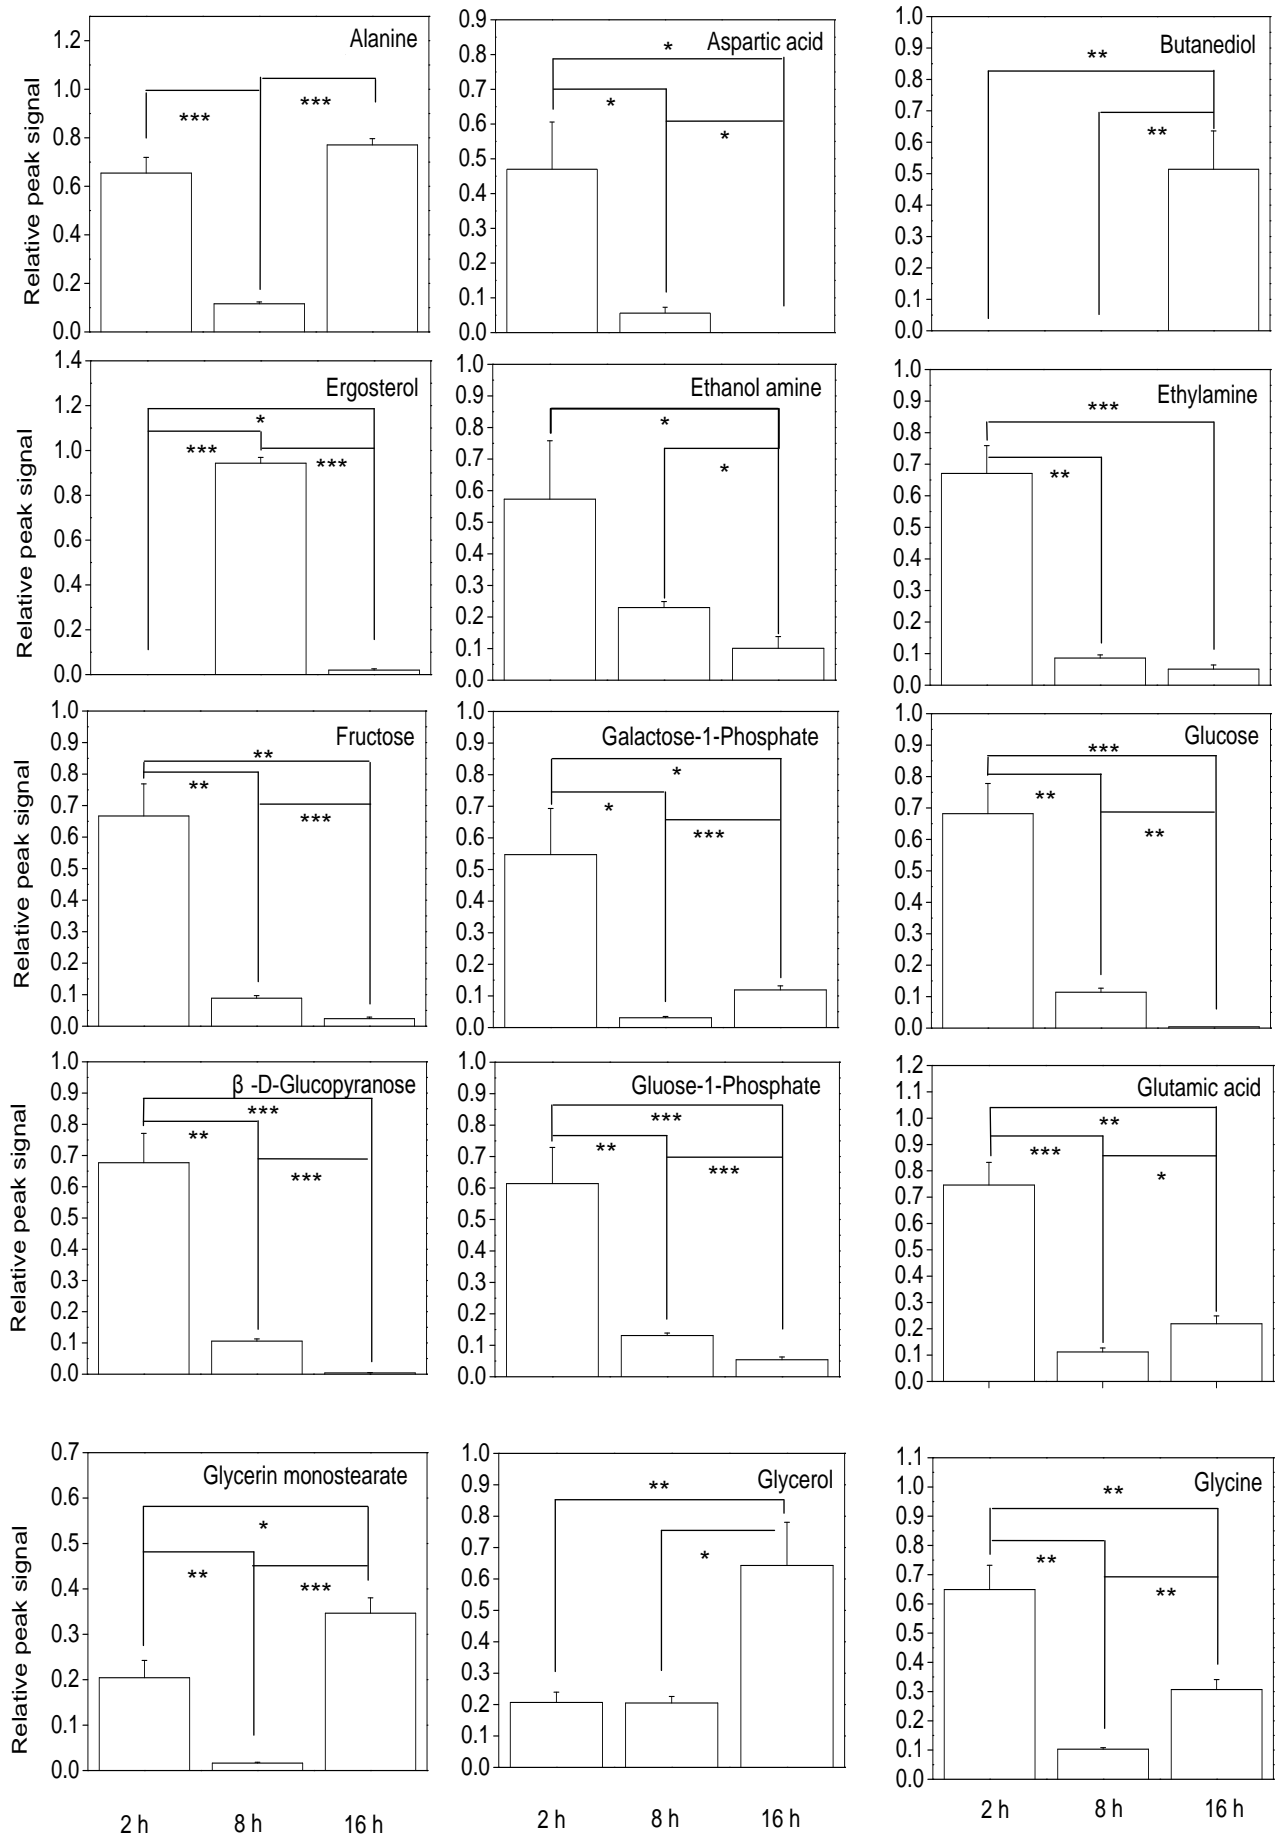

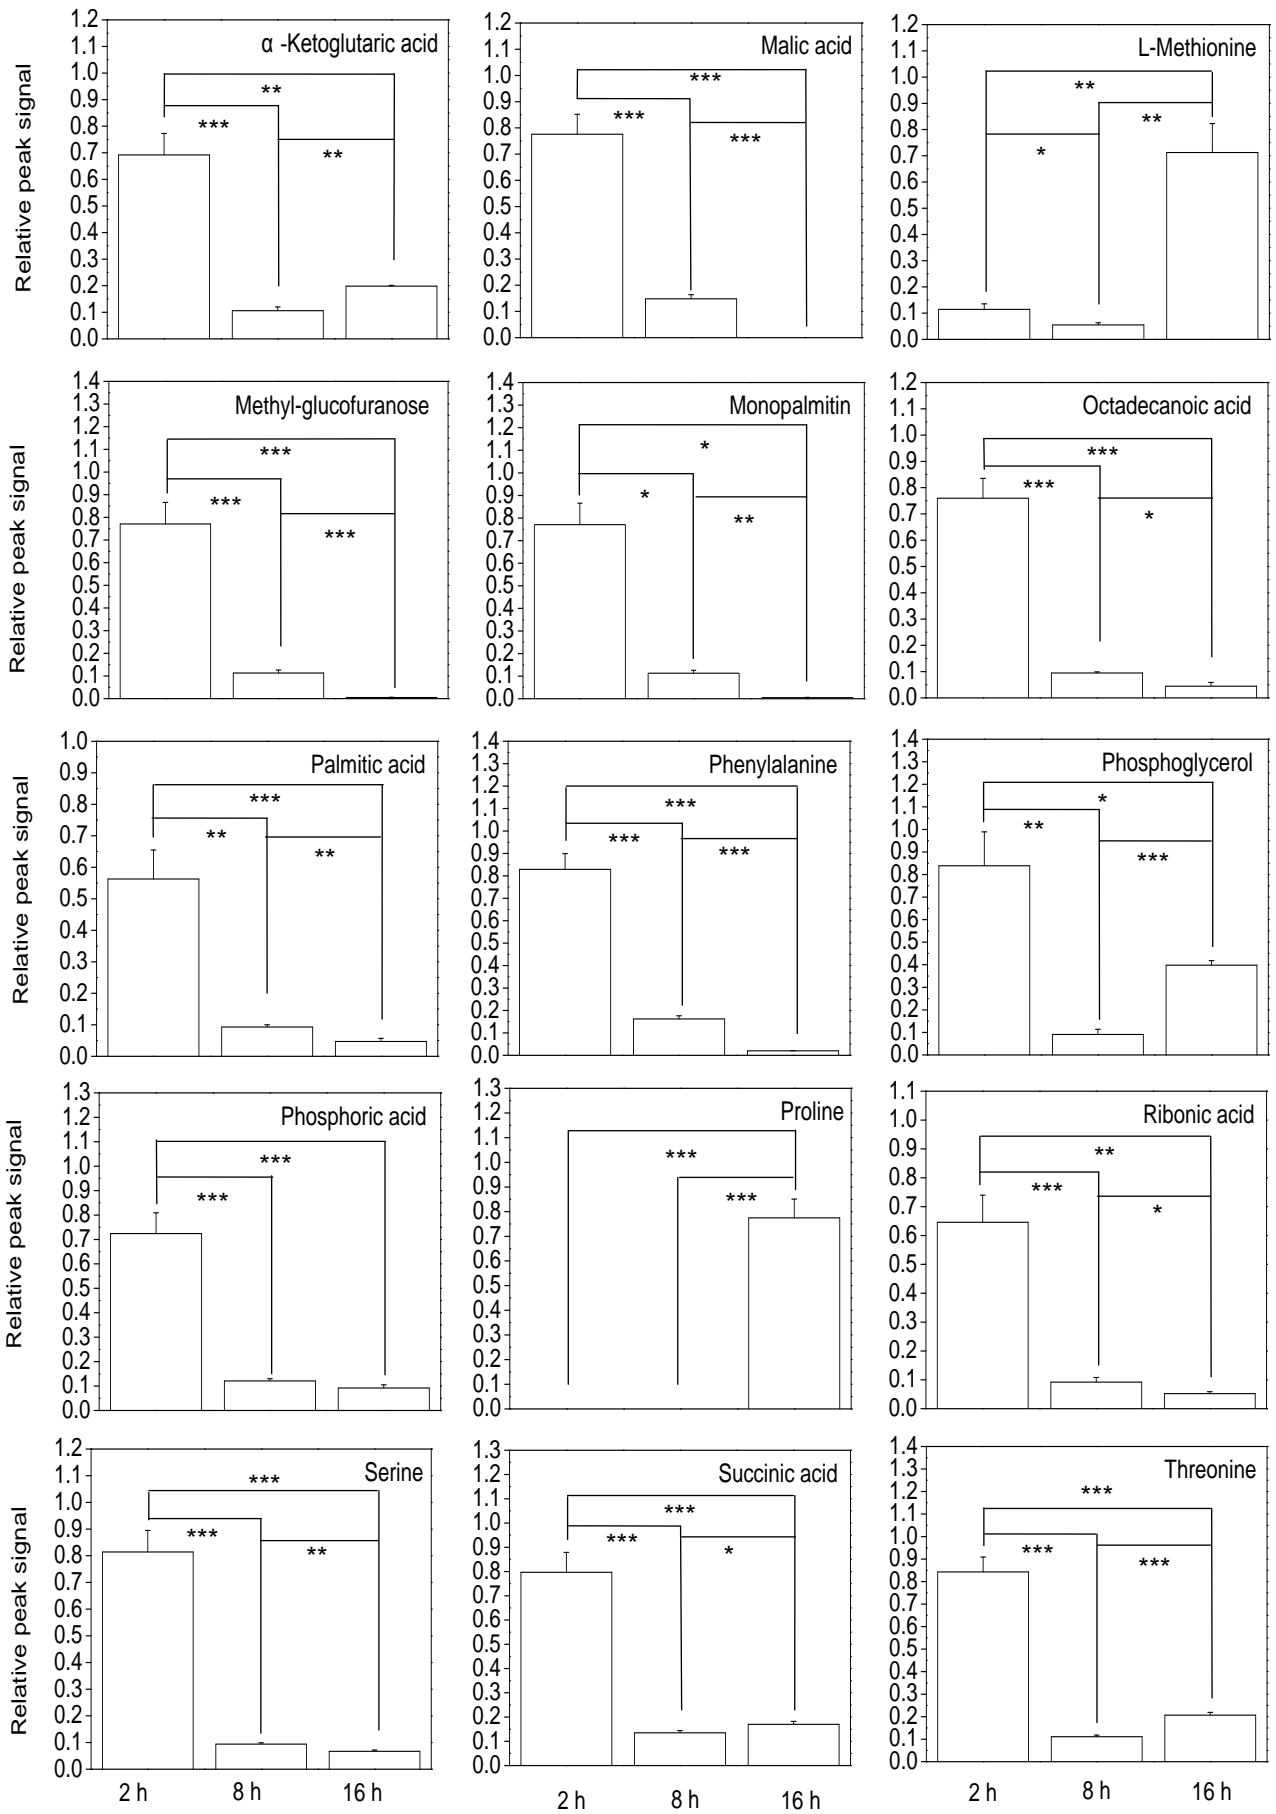

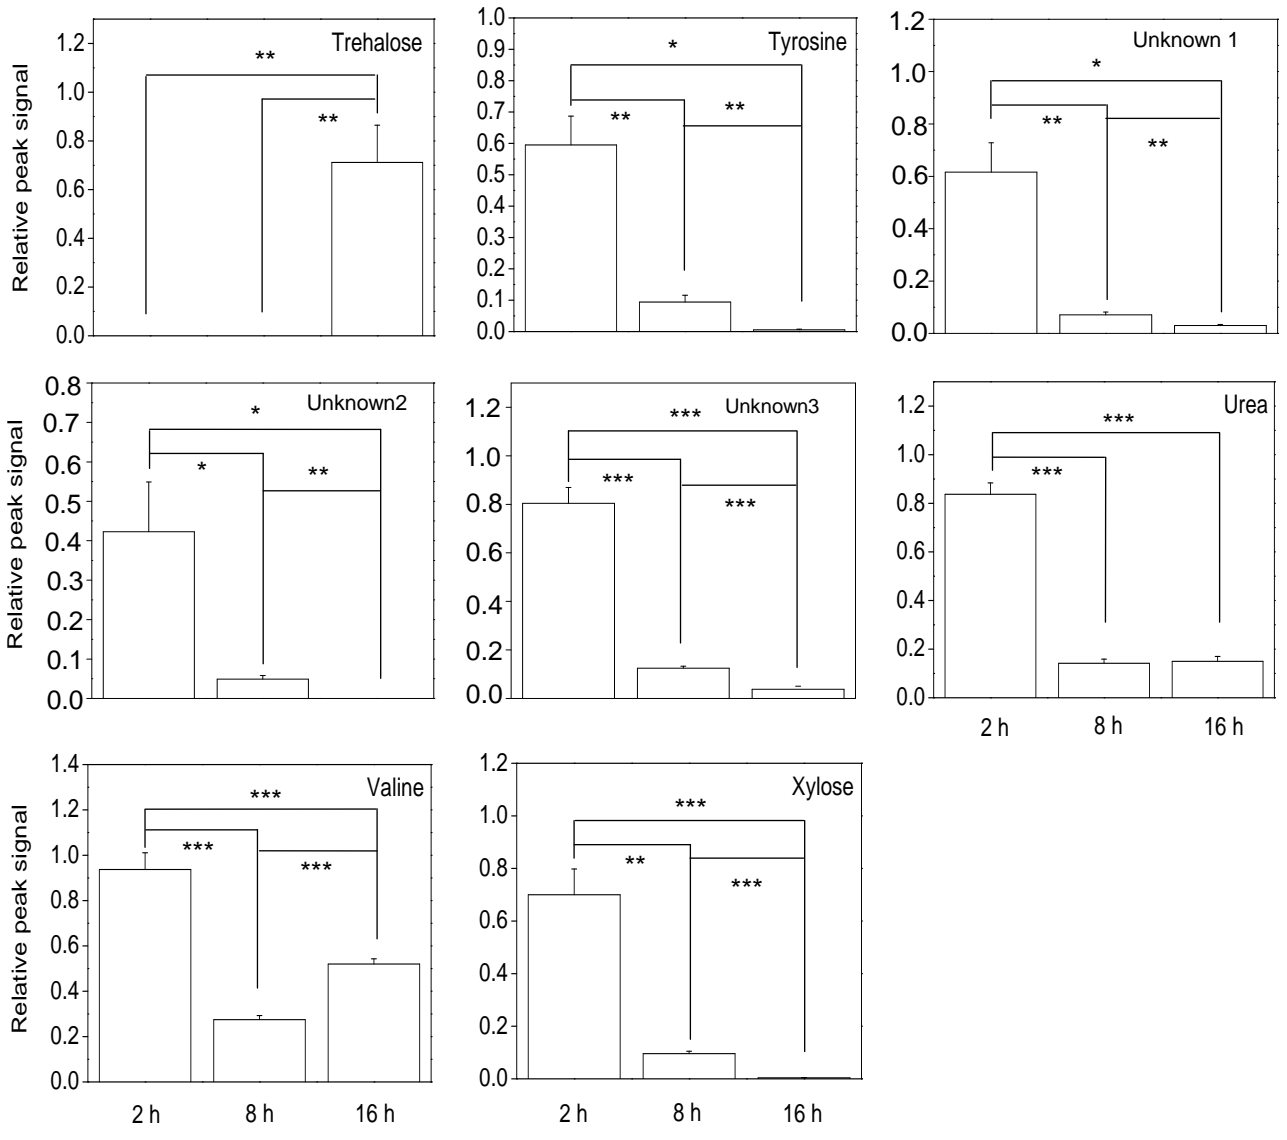

ESI Fig. S-2
